# Supplementary material for: Assessing the Feasibility of Providing a Family Skills Intervention, “Strong Families”, for Refugee Families Residing in Reception Centers in Serbia
Source: MDPI journal article supplement (doi:10.3390/ijerph18094530), 2021-04-24
Supplement: s1 [file s1]

# Supplementary materials

**Table S1 (within supplementary materials.** Demographic Characteristics of Study Participants at Baseline as reported by caregivers.

| CAREGIVERS                             |                           | Total<br>(n=25) | Mothers<br>(n=20) | Fathers<br>(n=5) | <i>t</i> , <i>X</i> <sup>2</sup> | P-<br>value |
|----------------------------------------|---------------------------|-----------------|-------------------|------------------|----------------------------------|-------------|
| Age of caregivers                      | Mean in years ( $\pm$ SD) | 33.4 (5.99)     | 32.6<br>(6.11)    | 36.8<br>(4.49)   | <i>t</i> <sub>23</sub> =1.45     | 0.160       |
| Marital status                         | Married                   | 22 (88%)        | 17 (85%)          | 5 (100%)         | 0.85 (2<br>df)                   | 0.653       |
|                                        | Divorced/separated        | 1 (4%)          | 1 (5%)            | 0                |                                  |             |
|                                        | Widow/er                  | 2 (8%)          | 2 (10%)           | 0                |                                  |             |
| Education                              | Primary School or Less    | 14 (56%)        | 12 (60%)          | 2 (40%)          | 1.79 (3<br>df)                   | 0.618       |
|                                        | Some High School          | 5 (20%)         | 4 (20%)           | 1 (20%)          |                                  |             |
|                                        | Completed High School     | 5 (20%)         | 3 (15%)           | 2 (40%)          |                                  |             |
|                                        | University Degree         | 1 (4%)          | 1 (5%)            | 0                |                                  |             |
| Partner's education                    | Primary School or Less    | 12 (48%)        | 10 (50%)          | 2 (40%)          | 4.86 (3<br>df)                   | 0.182       |
|                                        | Some High School          | 9 (36%)         | 8 (40%)           | 1 (20%)          |                                  |             |
|                                        | Completed High School     | 3 (12%)         | 1 (5%)            | 2 (40%)          |                                  |             |
|                                        | University Degree         | 1 (4%)          | 1 (5%)            | 0                |                                  |             |
| Working Status                         | Full Time                 | 1 (4%)          | 1 (5%)            | 0                | 3.28 (3<br>df)                   | 0.350       |
|                                        | Part Time                 | 6 (24%)         | 6 (30%)           | 0                |                                  |             |
|                                        | Searching for a job       | 8 (32%)         | 5 (25%)           | 3 (60%)          |                                  |             |
|                                        | Not working               | 10 (40%)        | 8 (40%)           | 2 (40%)          |                                  |             |
| Partner's working status               | Full Time                 | 1 (4.6%)        | 1 (5.9%)          | 0                | 7.03 (3<br>df)                   | 0.071       |
|                                        | Part Time                 | 9 (40.9%)       | 9 (52.9%)         | 0                |                                  |             |
|                                        | Searching for a job       | 5 (22.7%)       | 2 (11.8%)         | 3 (60%)          |                                  |             |
|                                        | Not working               | 7 (31.8%)       | 5 (29.4%)         | 2 (40%)          |                                  |             |
| Number of Children                     | Mean ( $\pm$ -SD)         | 3.3 (1.70)      | 3.5 (1.79)        | 2.6 (1.14)       | <i>t</i> <sub>23</sub> =-1.06    | 0.300       |
|                                        | 1                         | 3 (12%)         | 2 (10%)           | 1 (20%)          | 1.77 (4<br>df)                   | 0.778       |
|                                        | 2                         | 5 (20%)         | 4 (20%)           | 1 (20%)          |                                  |             |
|                                        | 3                         | 8 (32%)         | 6 (30%)           | 2 (40%)          |                                  |             |
|                                        | 4                         | 4 (16%)         | 3 (15%)           | 1 (20%)          |                                  |             |
|                                        | More than 4               | 5 (20%)         | 5 (25%)           | 0                |                                  |             |
| CHILDREN in program                    |                           | Total<br>(n=25) | Girls<br>(n=9)    | Boys<br>(n=16)   | <i>t</i> , <i>X</i> <sup>2</sup> | P-<br>value |
| Age of child in program                | Mean in years ( $\pm$ SD) | 10.5 (2.38)     | 11.2<br>(2.77)    | 10.1<br>(2.11)   | <i>t</i> <sub>23</sub> =-1.18    | 0.251       |
| Mean age ( $\pm$ SD) of other children | Child 2 (n=22)            | 9.5 (3.64)      | 10.6<br>(4.39)    | 8.5 (2.46)       | <i>t</i> <sub>20</sub> =-1.38    | 0.184       |
|                                        | Child 3 (n=17)            | 7.7 (3.64)      | 8.3 (3.20)        | 7.4 (3.96)       | <i>t</i> <sub>15</sub> =-0.51    | 0.615       |
|                                        | Child 4 (n=9)             | 6.5 (5.40)      | 4.6 (4.82)        | 7.5 (5.82)       | <i>t</i> =0.74                   | 0.482       |
|                                        | Child 5 (n=5)             | 6.8 (3.77)      | 6.8 (3.77)        | -                | -                                | -           |

|                                  |                      |                         |                           |                          |                         |                     |
|----------------------------------|----------------------|-------------------------|---------------------------|--------------------------|-------------------------|---------------------|
|                                  | <b>Child 6 (n=3)</b> | 7.7 (8.08)              | 3.0 (-)                   | 10.0<br>(9.90)           | t <sub>1</sub> =0.58    | 0.667               |
| <b>Relationship to caregiver</b> | <b>Mother</b>        | 20 (80%)                | 9 (100%)                  | 11 (69%)                 | 3.52 (1                 | 0.061               |
|                                  | <b>Father</b>        | 5 (20%)                 | 0                         | 5 (31%)                  | df)                     |                     |
| <b>FAMILIES</b>                  |                      | <b>Total<br/>(n=25)</b> | <b>Mothers<br/>(n=20)</b> | <b>Fathers<br/>(n=5)</b> | <b>t, X<sup>2</sup></b> | <b>P-<br/>value</b> |
| <b>In Serbia</b>                 | Mean in years (±SD)  | 1.0 (0.14)              | 1.0 (0.16)                | 1.0 (0.07)               | t <sub>23</sub> =-0.23  | 0.824               |

\* Country of origin: Afghanistan, SD: standard deviation.
